# Supplementary material
Source: publisher site journal article supplement (https://www.spandidos-publications.com/3495/downloadSupplementary)
Supplement: Supplementary file 1 [file downloadSupplementary]

Figure S1. (A) Primers for PCR products used for gene mutations. (B) Mutation hotspots in *hPIK3CA/mPik3ca*, which were previously reported in breast/mammary carcinomas in humans and mice. *hPIK3CA*, *PIK3CA* (human); *mPik3ca*, *Pik3ca* (mouse) Ex, exon.

**A** Primers for PCR products used for gene mutations

| Target gene     | Primers                                            | Annealing temp. |
|-----------------|----------------------------------------------------|-----------------|
| <i>Hras</i> :   |                                                    |                 |
| Ex 2, codon 61  | F; AAACAGGTAGTCATTGATGG<br>R; GCAAATACACAGAGGAAGCC | 61              |
| <i>Pik3ca</i> : |                                                    |                 |
| Ex 6            | F; AAGCCACTCTACCCCCAACT<br>R; GGAGCCACAGCTGGTTATGT | 62              |
| Ex 7            | F; TTCTCCTCCCAGAGAAGCAT<br>R; TGGAAACTTCACCACACTGC | 60              |
| Ex 9            | F; CCAAGGAAATCATGGCAGAG<br>R; TGTCCCTGACAGGAAGAAGG | 60              |
| Ex 20           | F; TACCCAGGACAGCTGTGCTA<br>R; CCCAGCTCCCATCTCAGTTC | 65              |

**B**

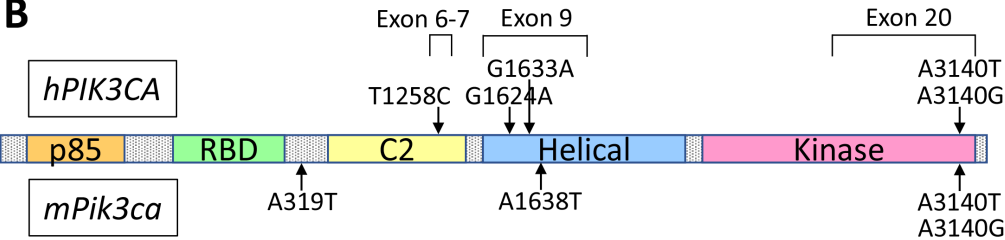

Mutation hotspots in *hPIK3CA/mPik3ca*, which were previously reported in breast/mammary adenocarcinomas in humans and mice.

The boxes illustrate functional domains, the p85-binding domain, Ras-binding domain, C2 domain, helical domain, and kinase domain (1). The principle location, and base and amino acid substitution in human breast cancers were T1258C:C420R (2), G1624A:E542K (2, 3), G1633A:E545K (1-3), A3140G:H1047R (1-3), and A3140T:H1047L (2). Those in DMBA-induced mammary adenocarcinomas were A319T:N107Y, A1638T:Q546H (4), A3140G:H1047R (4), and A3140T:H1047L (4).

1. Samuels Y et al., Science 304, 554, 2004.
2. Campbell IG et al., Cancer Res 64, 7678, 2004.
3. Bachman KE et al., Cancer Biol Ther 3, 772-775, 2004
4. Abba MC et al., Oncotarget 7, 64289, 2016.

Figure S2. (A) Mammary carcinoma with solid/microacinar structures in a C3H- crossed with BALB/c-N2 *Trp53* heterozygous knockout mouse; scale bar, 50  $\mu$ m) (24). (B) Serial section to (A) immunostained with ER $\alpha$ ; nuclear positive cells were scattered. (C) Immunostaining for pERK; cytoplasmic/nuclear positive cells were observed. (D) Immunostaining for  $\beta$ -catenin; membranous positivity was detected. (E) Staining for pAkt was negative. (F) Summary of immunohistochemical and mutation analyses of spontaneous mammary carcinomas in C3H- crossed with BALB/c *Trp53* heterozygous knockout mice. N2, second generation; *Trp53*, tumor protein p53; ER $\alpha$ , estrogen receptor  $\alpha$ ; N, nuclear; CN, cytoplasmic/nuclear; M, membranous; MC, membranous/cytoplasmic; NT, not tested.

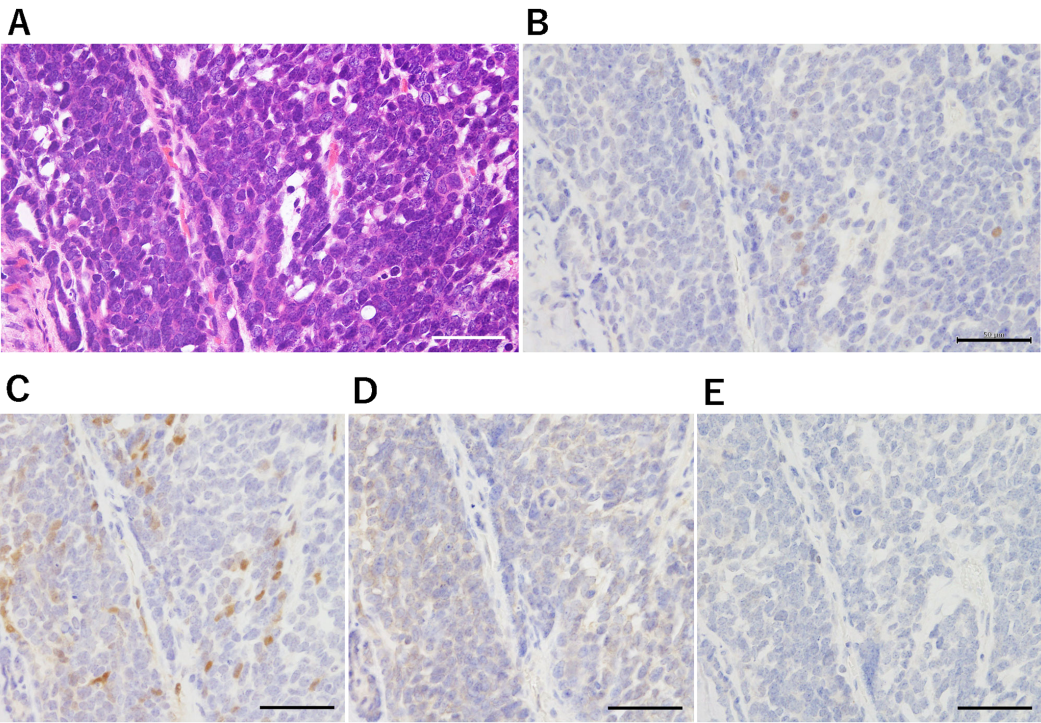

**F** Summary of immunohistochemical and mutation analyses of spontaneous mammary carcinomas in C3H- backcrossed to BALB/c- *Trp53* heterozygous knockout mice

|                        | F1 |    |    | N2 |      |    |      |
|------------------------|----|----|----|----|------|----|------|
| Sample #               | 1  | 2  | 3  | 1  | 2    | 3  | 4    |
| Immunohistochemistry   |    |    |    |    |      |    |      |
| ER $\alpha$            | +  | –  | –  | +  | –    | +  | –    |
| pERK1/2                | CN | CN | CN | CN | CN/M | CN | CN/M |
| pAKT                   | N  | –  | –  | –  | –    | –  | –    |
| $\beta$ -catenin       | M  | M  | M  | N  | M    | M  | M    |
| Gene mutation          |    |    |    |    |      |    |      |
| <i>Hras</i> , codon 61 | –  | –  | NT | –  | NT   | –  | –    |

  

|                        | N3   |      |   |   | N4 |      |    |    |      |   |
|------------------------|------|------|---|---|----|------|----|----|------|---|
| Sample #               | 1    | 2    | 3 | 4 | 1  | 2    | 3  | 4  | 5    | 6 |
| Immunohistochemistry   |      |      |   |   |    |      |    |    |      |   |
| ER $\alpha$            | –    | –    | – | – | –  | +    | –  | –  | –    | + |
| pERK1/2                | CN/M | CN/M | – | – | CN | N    | CN | CN | CN/M | – |
| pAKT                   | –    | –    | – | – | –  | –    | –  | –  | MC   | – |
| $\beta$ -catenin       | MC/N | M    | M | M | N  | MC/N | MC | M  | M    | M |
| Gene mutation          |      |      |   |   |    |      |    |    |      |   |
| <i>Hras</i> , codon 61 | –    | NT   | – | – | –  | –    | –  | –  | –    | – |
